# Supplementary material for: Wafer-Level Highly Dense Metallic Nanopillar-Enabled High-Performance SERS Substrates for Molecular Detection
Source: MDPI journal article supplement (doi:10.3390/nano13111733), 2023-05-25
Supplement: s1 [file s1]

# Support Information For

## Wafer-Level Highly Dense Metallic Nanopillar-Enabled High-Performance SERS Substrates for Molecular Detection

Pei Zeng <sup>1,†</sup>, Mengjie Zheng <sup>2,\*,†</sup>, Hao Chen <sup>2</sup>, Guanying Chen <sup>2</sup>, Zhiwen Shu <sup>3,4</sup>, Lei Chen <sup>3,4</sup>,  
Huikang Liang <sup>3,4</sup>, Yuting Zhou <sup>5</sup>, Qian Zhao <sup>1,\*</sup> and Huigao Duan <sup>3,4</sup>

<sup>1</sup> State Key Laboratory of Tribology in Advanced Equipment, Department of Mechanical Engineering, Tsinghua University, Beijing 100084, China

<sup>2</sup> Jihua Laboratory, Foshan 528000, China

<sup>3</sup> College of Mechanical and Vehicle Engineering, National Engineering Research Centre for High Efficiency Grinding, Hunan University, Changsha 410082, China

<sup>4</sup> Greater Bay Area Innovation Institute, Hunan University, Guangzhou 511300, China

<sup>5</sup> Tsinghua Shenzhen International Graduate School, Tsinghua University, Beijing 100084, China

\* Correspondence: zhengmj@jihualab.ac.cn (M.Z.);  
zhaoqian@tsinghua.edu.cn (Q.Z.)

† These authors contribute equally to this work.

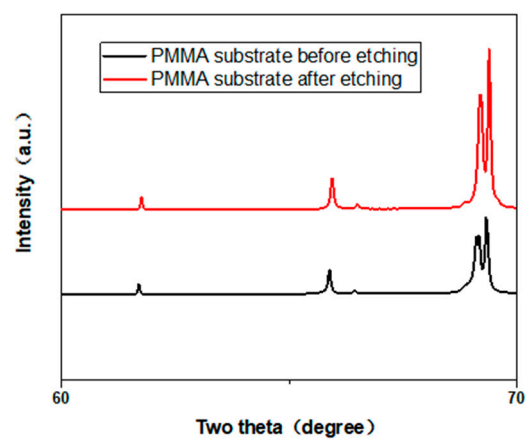

**Figure S1.** XRD patterns of the PMMA substrate before and after reactive ion etching.

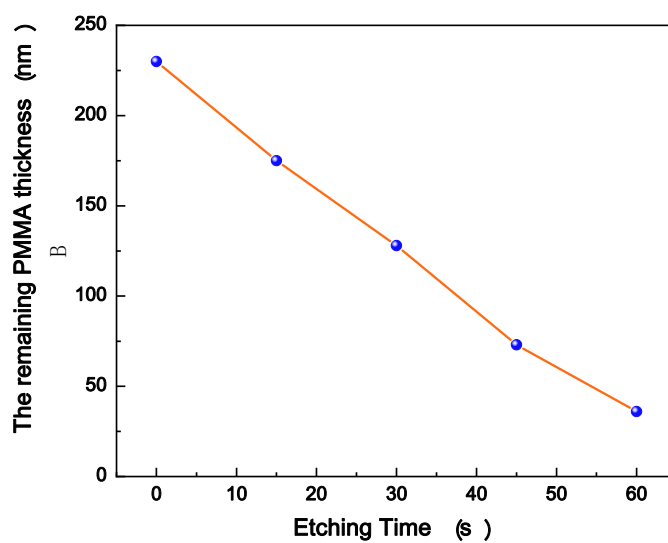

**Figure S2.** The functional relationship between the remaining PMMA thickness and the etching time.

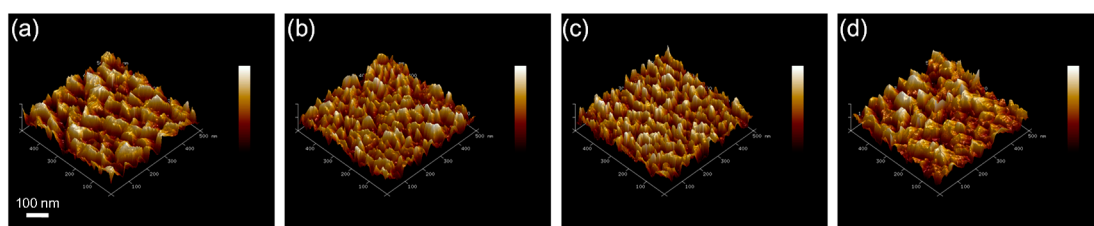

**Figure S3.** Atomic force microscopy characterization of the SERS substrates obtained

by different times of reactive ion etching: (a) 15 s, (b) 30 s, (c) 45 s, and (d) 60 s. It indicated the densest Ag nanopillars were obtained with an etching time of 45 s.

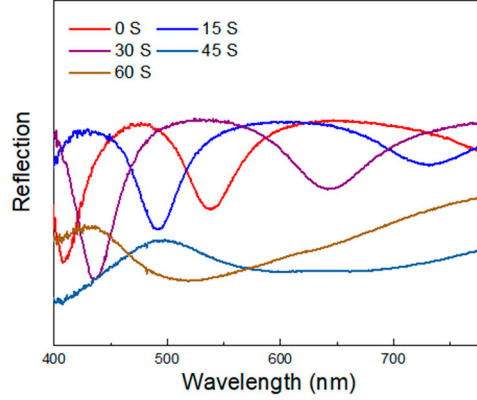

**Figure S4.** Reflection spectra of the SERS substrates obtained by different times of reactive ion etching.

#### The details of the SERS EF calculation

The corresponding SERS enhancement factor was assessed by applying the formula:

$$EF = \frac{I_{sers}/N_{sers}}{I_{sample}/N_{sample}}$$

where  $I_{SERS}$  and  $I_{sample}$  are the measured SERS intensities at the  $1618\text{ cm}^{-1}$  Raman peak of the detected CV molecules from the baseline-removed Raman spectra using a Gaussian–Lorentzian fitting for the proposed SERS substrate and the reference capillary tube sample, respectively.  $N_{SERS}$  and  $N_{sample}$  are the numbers of the CV molecules attached to the surface of the proposed substrate and the reference capillary tube sample, respectively.  $N_{SERS}$  can be expressed as

$$N_{sers} = \frac{\pi r^2}{\sigma}$$

where  $r$  is the semidiameter of the laser spot ( $\sim 2 \mu\text{m}$ ), and  $\sigma$  is the occupied area of a single-molecule ( $\sim 4 \text{ nm}^2$ ).  $N_{sample}$  can be expressed as

$$N_{sample} = \pi r^2 h c N_A$$

where  $c$  is the concentration of reference CV molecules ( $10^{-1} \text{ M}$ ),  $h$  is the confocal depth of the illuminated laser, and  $N_A$  is the Avogadro constant.

The baseline-removed Raman spectrum of the reference capillary tube sample was as follows:

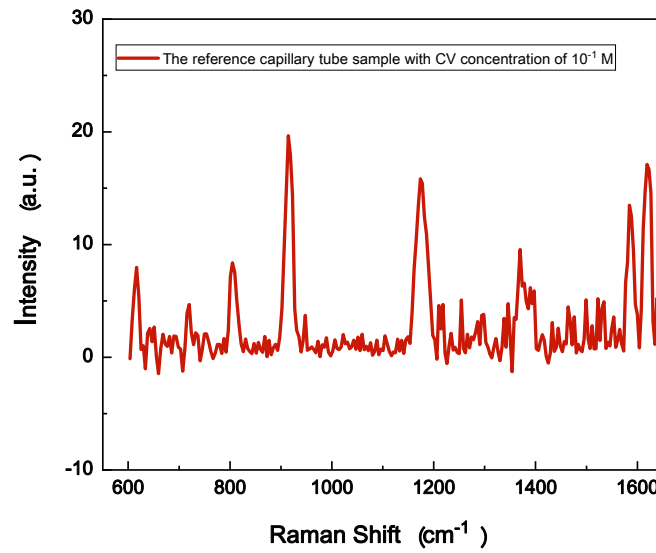

**Figure S5.** The baseline-removed Raman spectrum of the reference capillary tube sample with  $10^{-1} \text{ M}$  CV concentration.
